# Supplementary material for: Heterogeneous response of Siberian tree-ring and stable isotope proxies to the largest Common Era volcanic eruptions
Source: Copernicus journal article supplement (doi:10.5194/cp-2018-70), 2018-06-27
Supplement: Supplementary file [file cp-2018-70-AC2-supplement.pdf]

1 **Supplementary material:**

2

3 CE 536

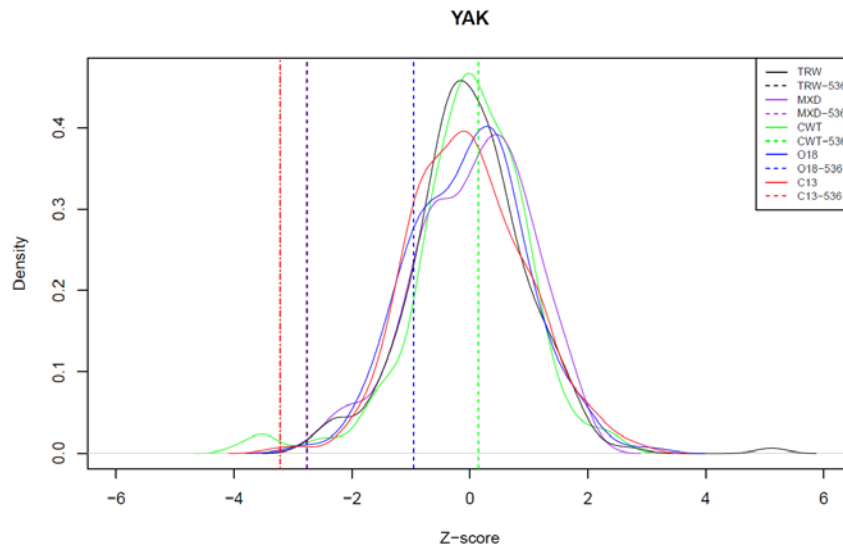

4

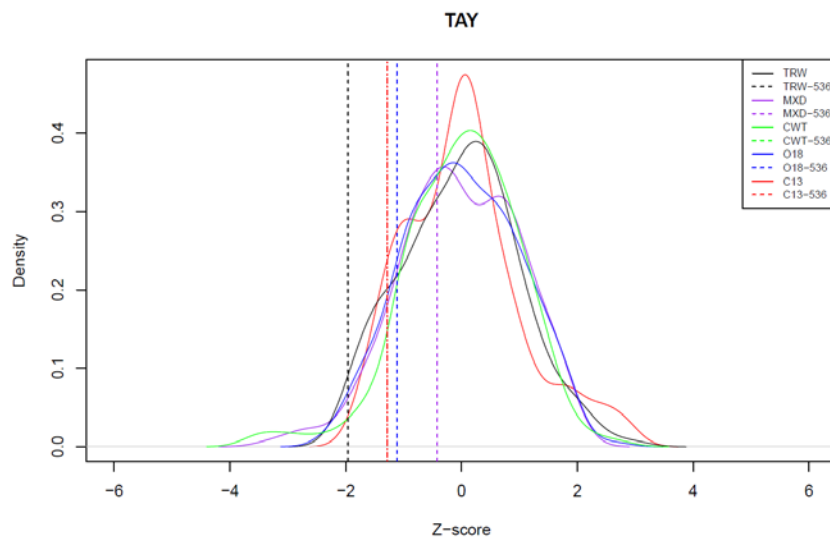

5

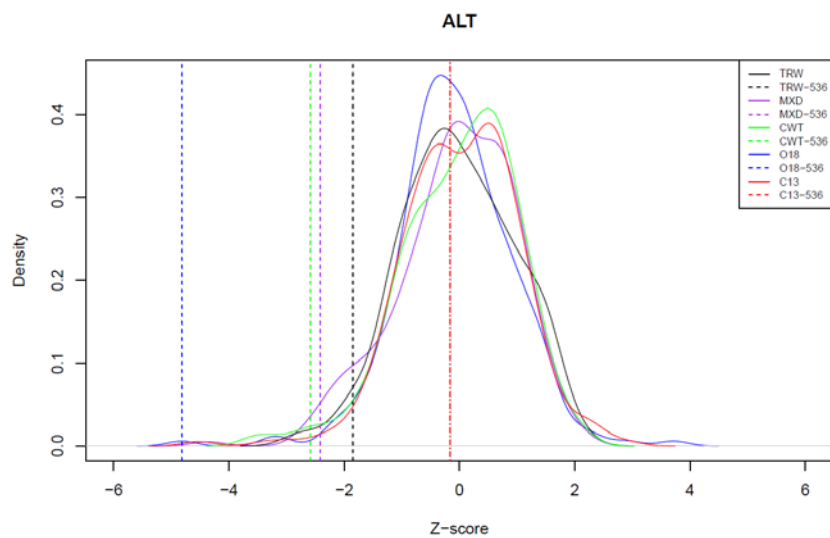

6

7 CE 537

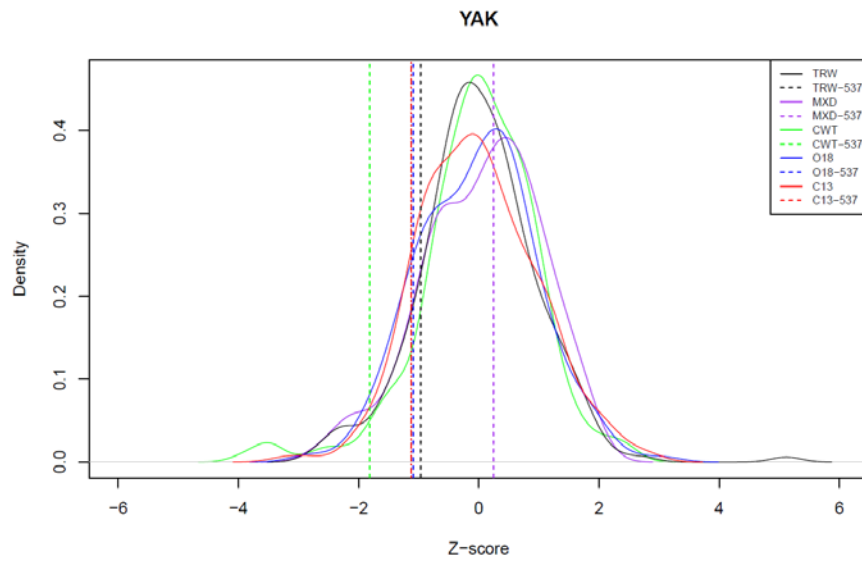

8

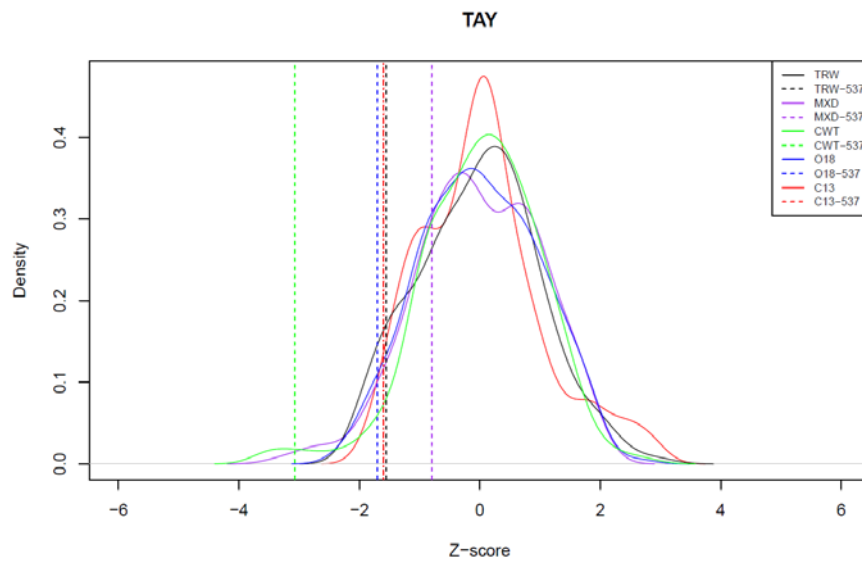

9

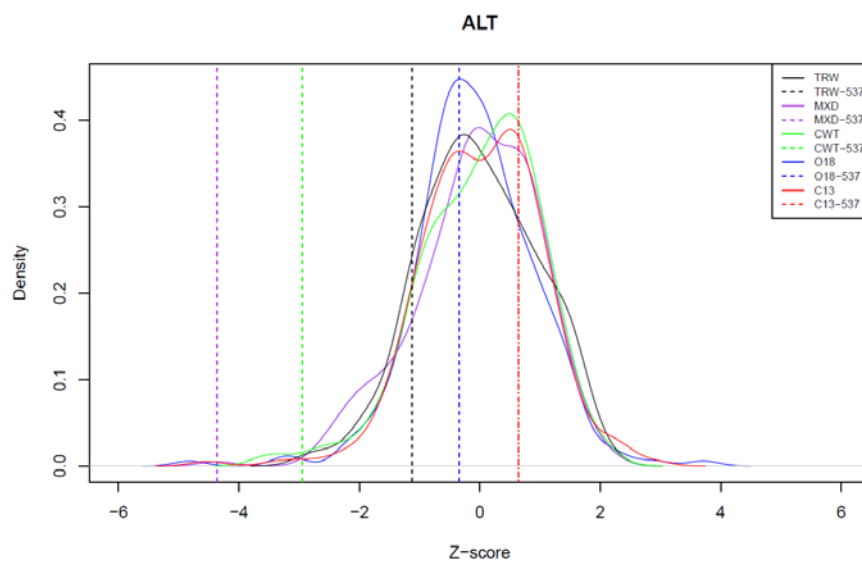

10

11 CE 538

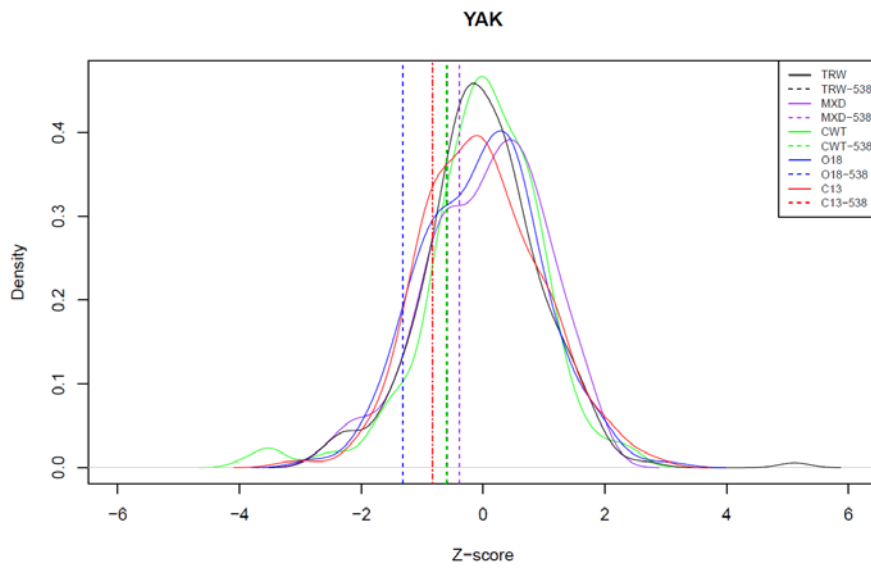

12

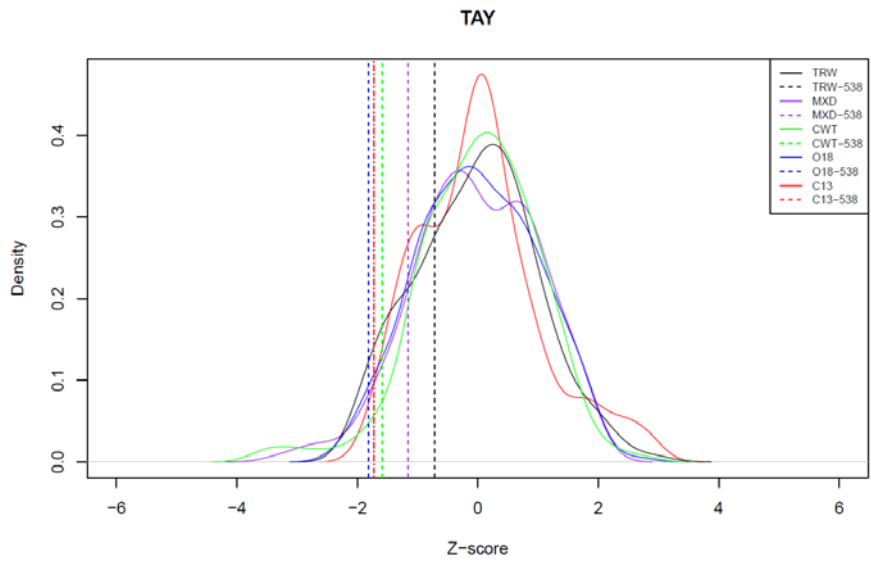

13

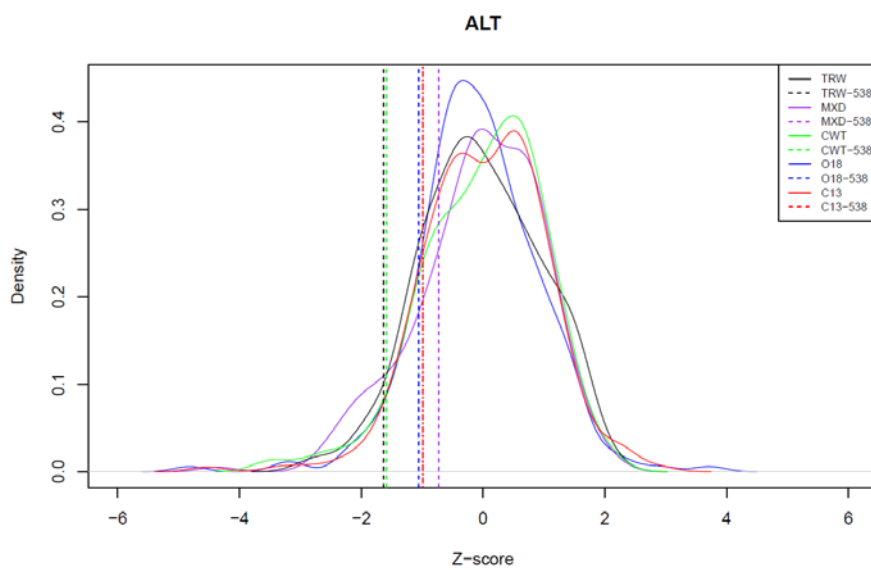

14

# SIBERIAN TREES AND VOLCANIC ERUPTIONS

15 CE 541

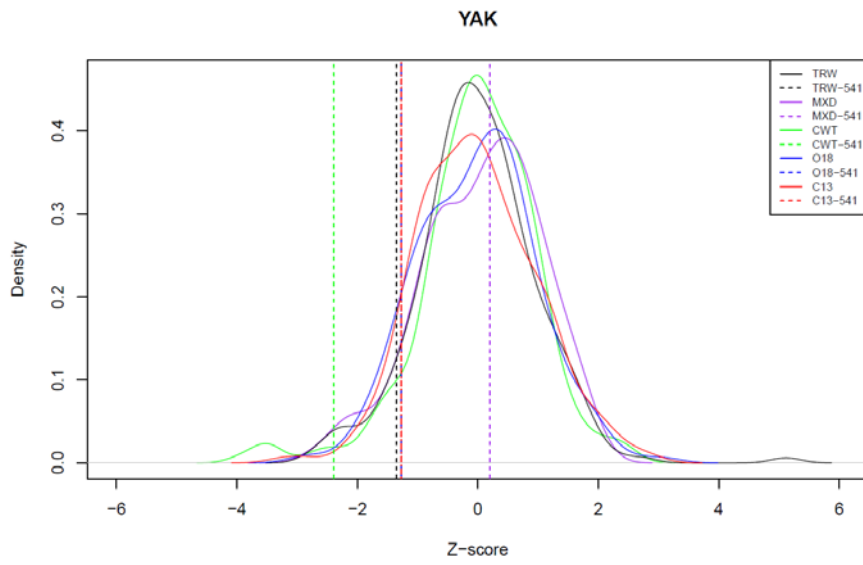

16

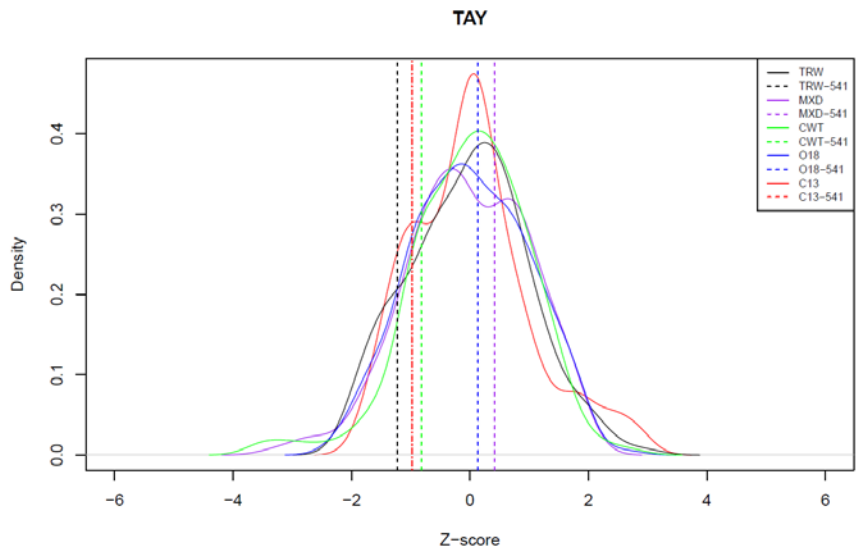

17

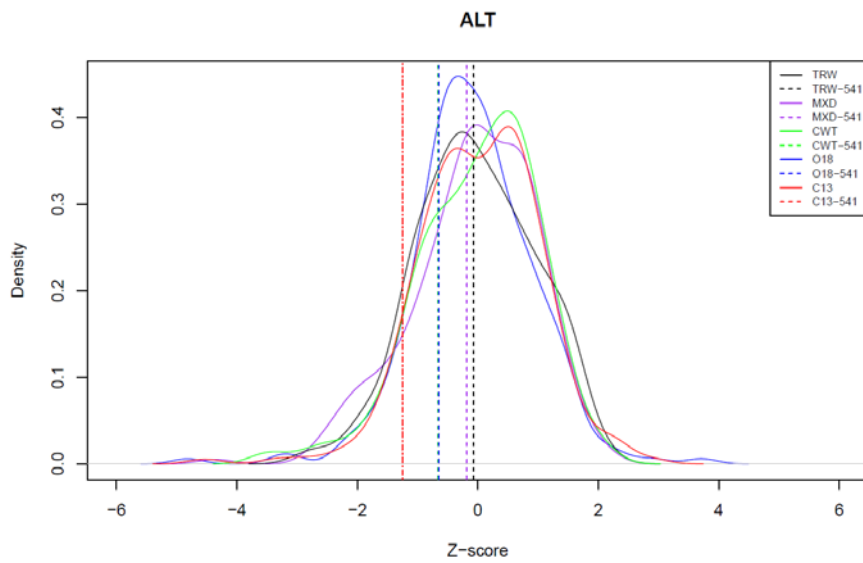

18

19 CE 542

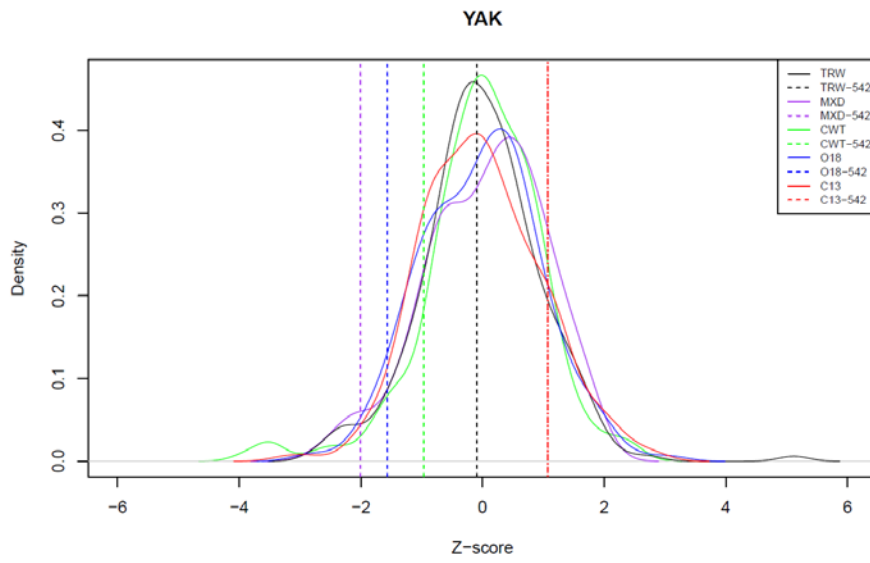

20

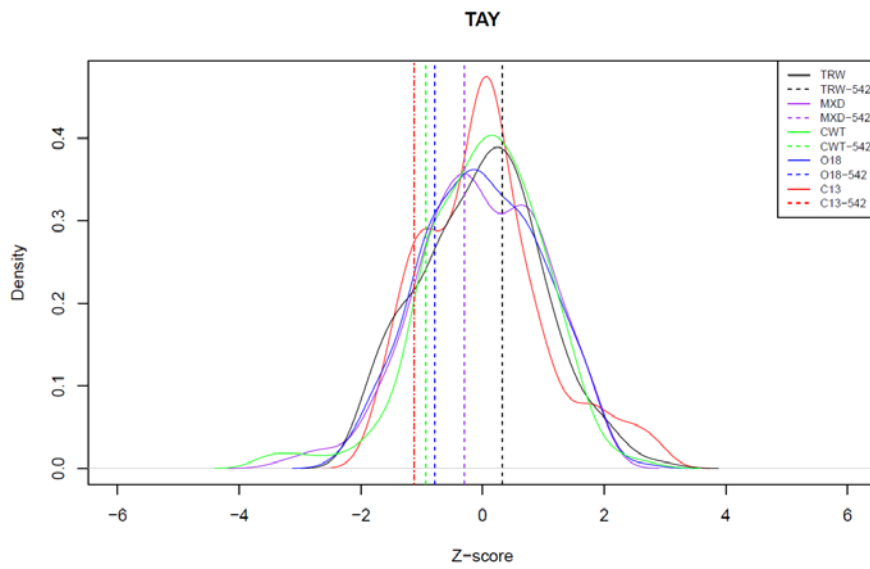

21

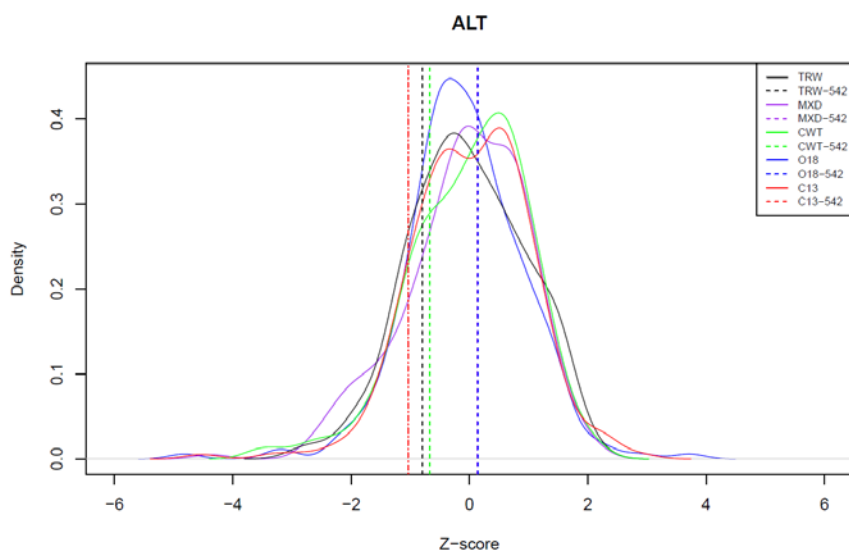

22

23 CE 1258

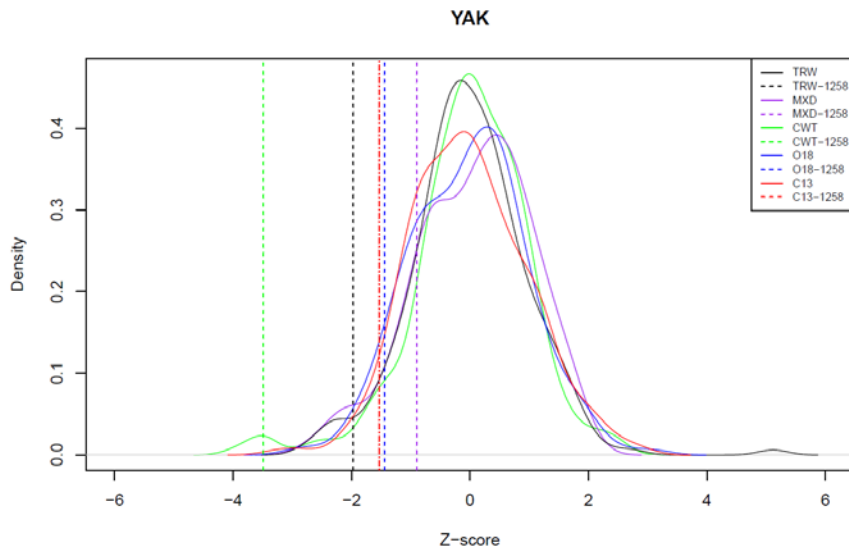

24

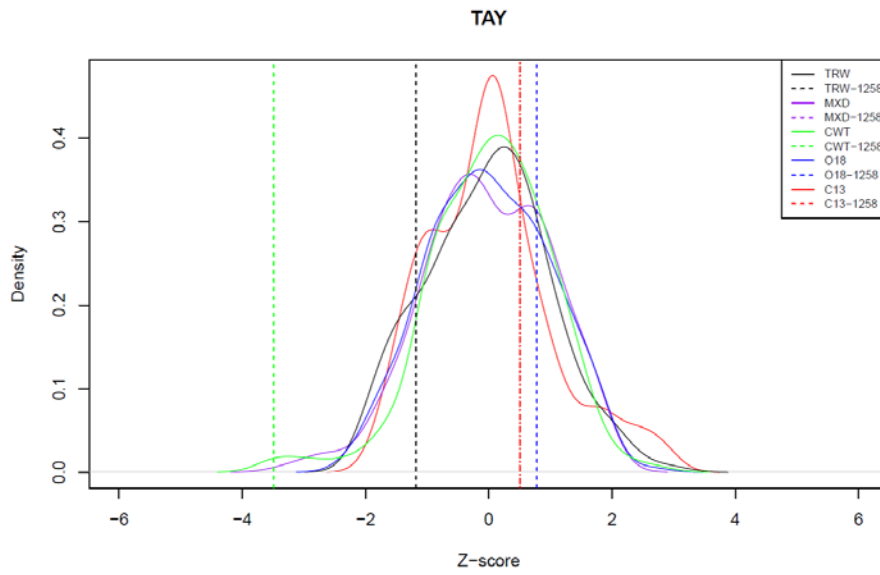

25

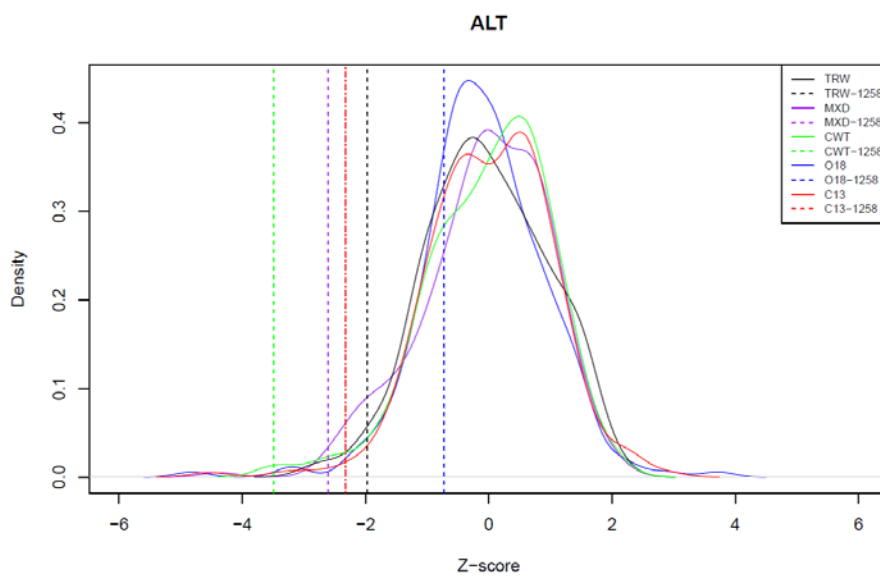

26

27 CE 1259

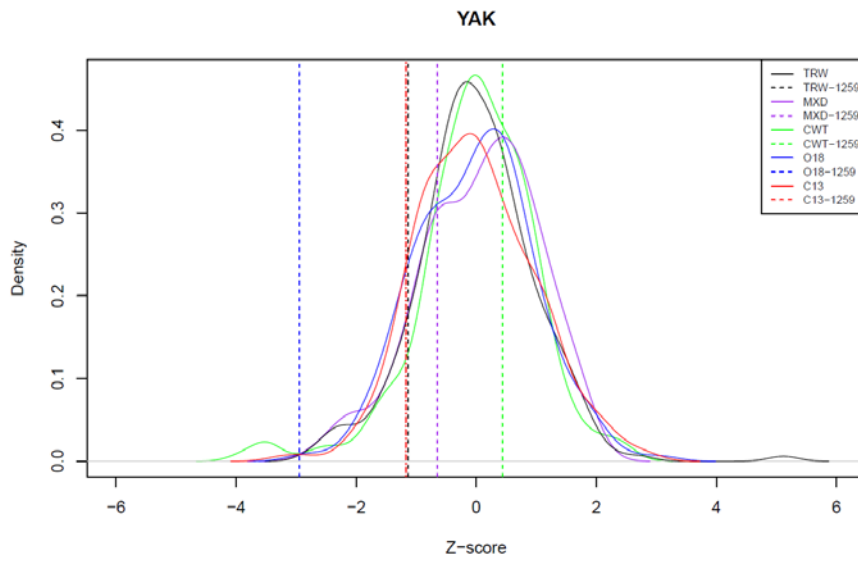

28

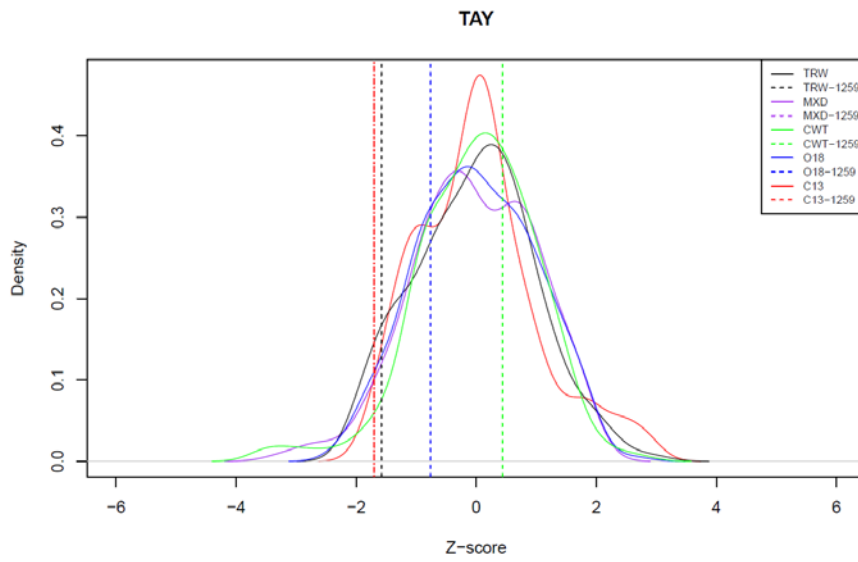

29

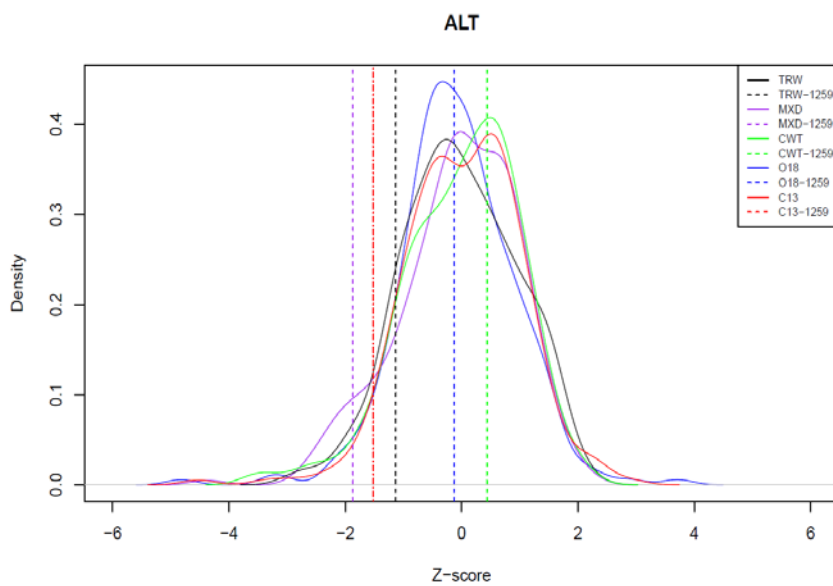

30

31 CE 1453

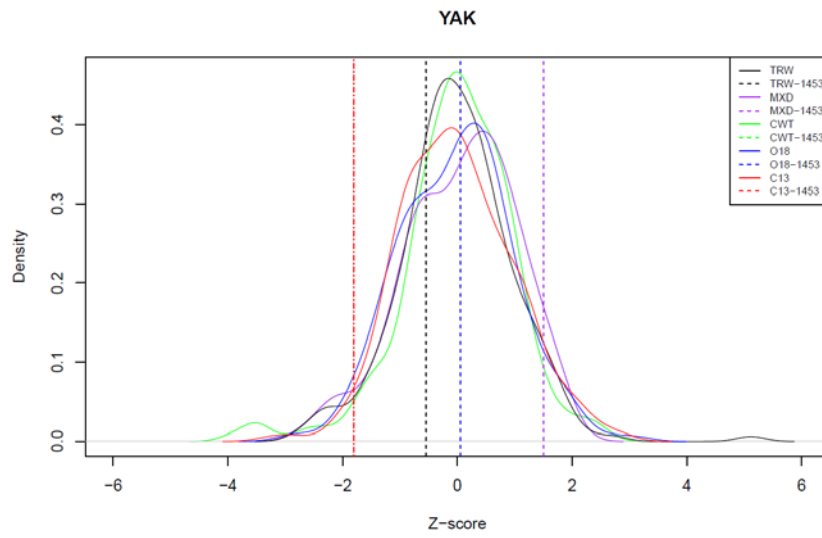

32

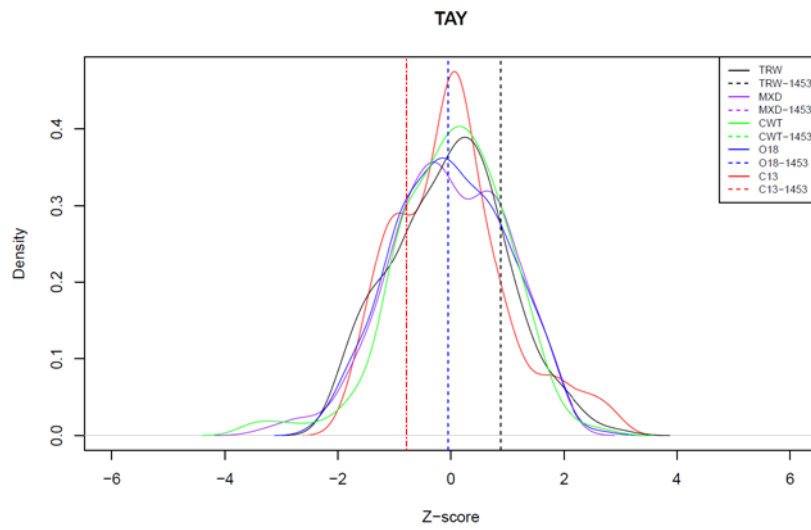

33

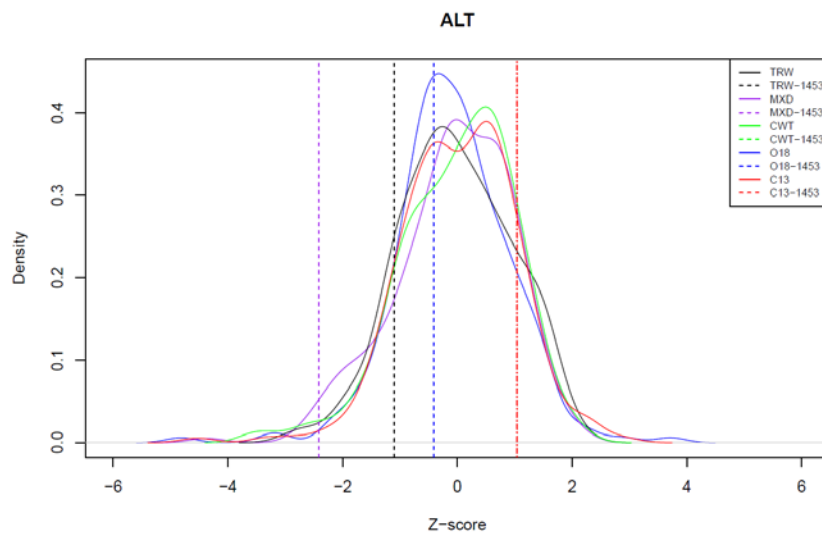

34

35



36 CE 1458

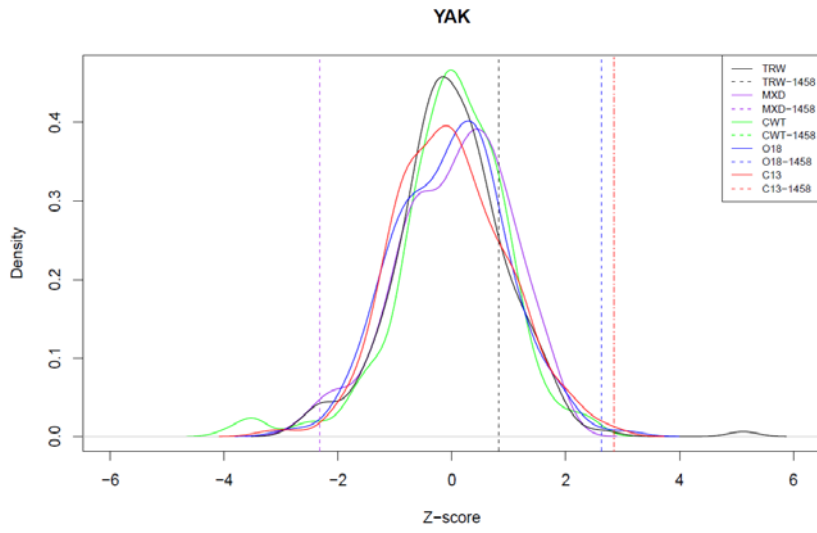

37

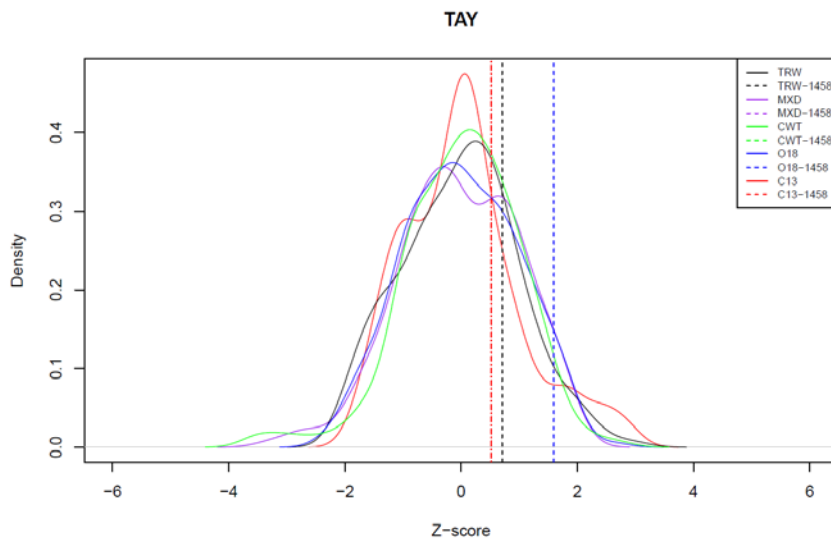

38

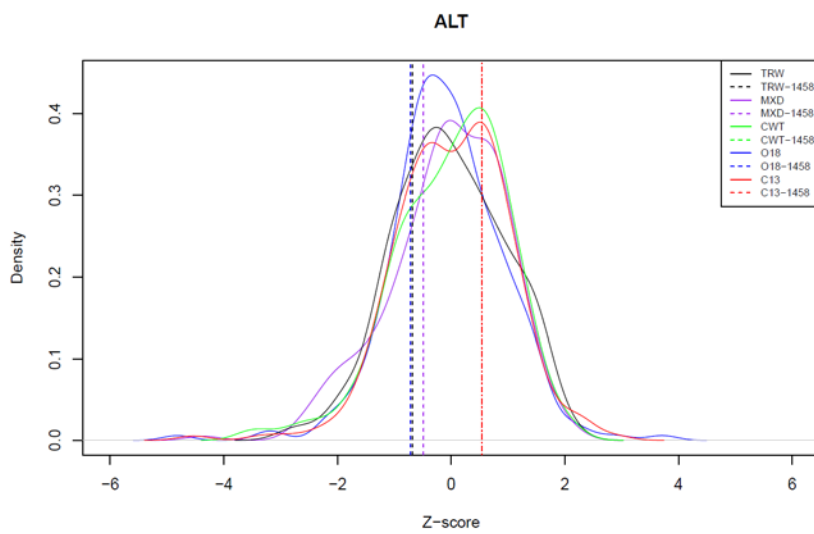

39

40

41 CE 1601

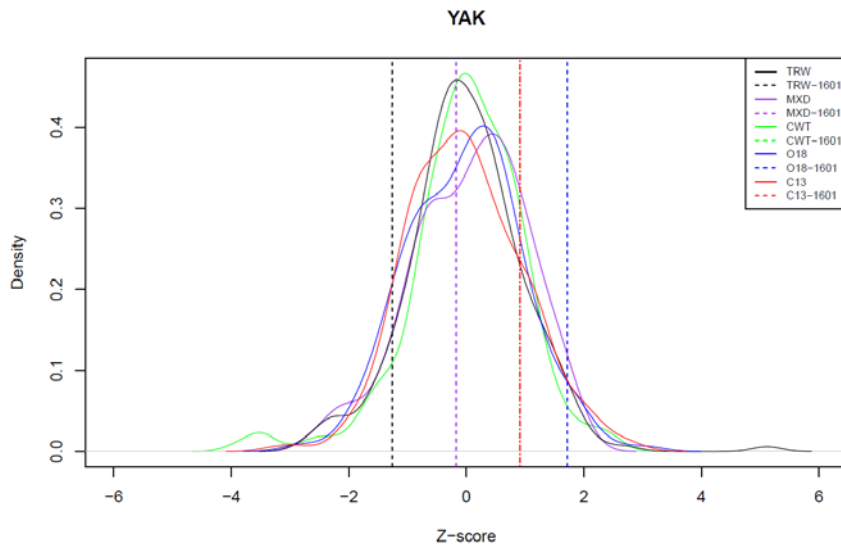

42

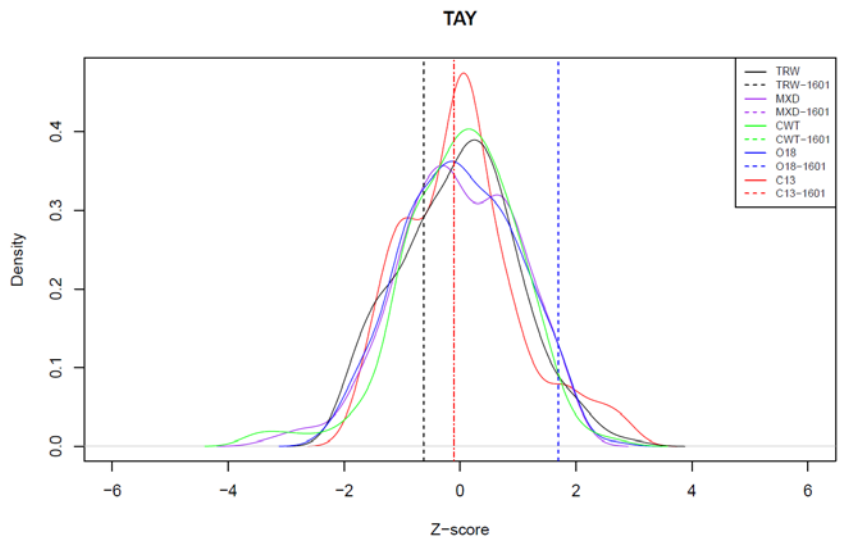

43

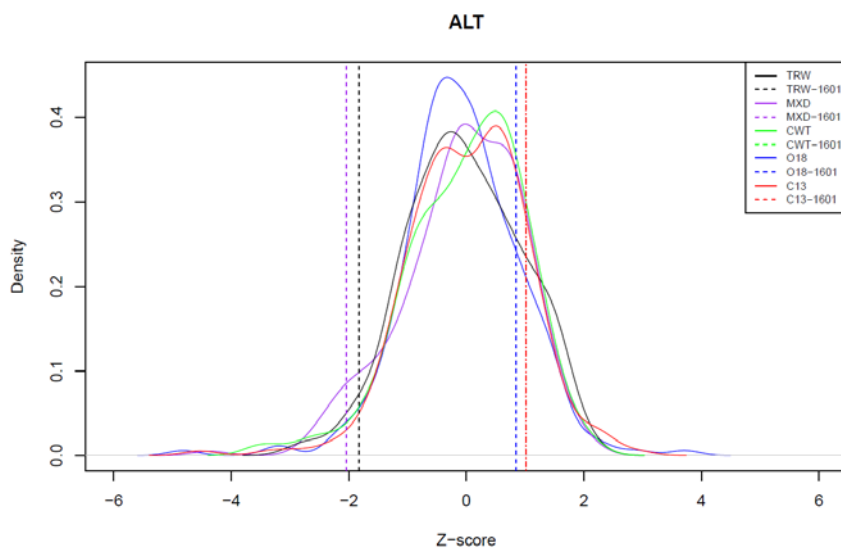

44

45 1602

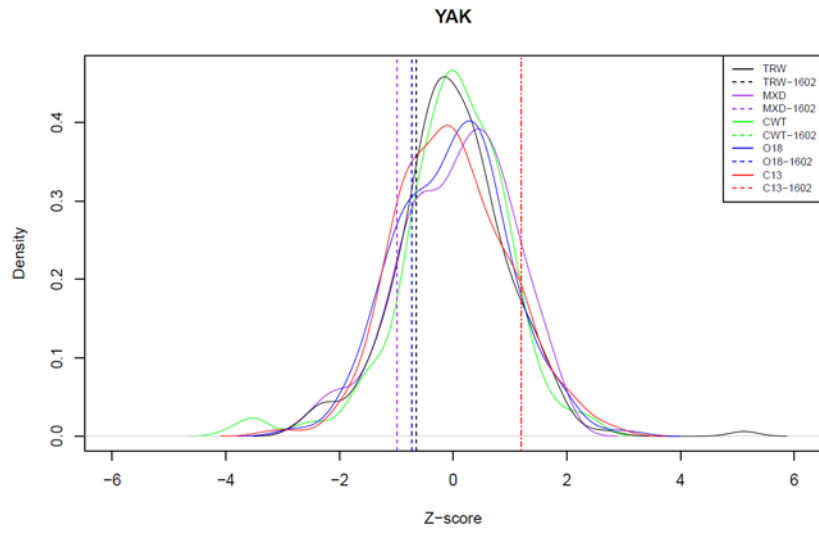

46

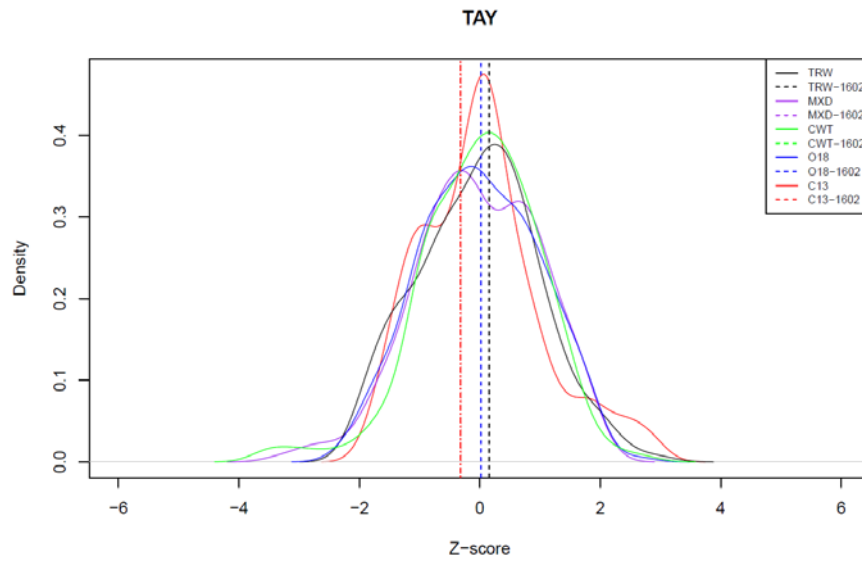

47

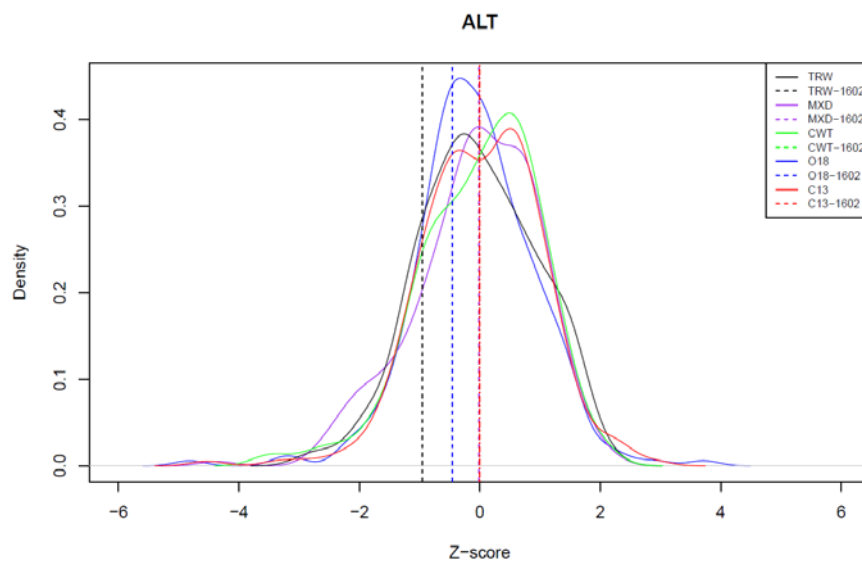

48

49 CE 1641

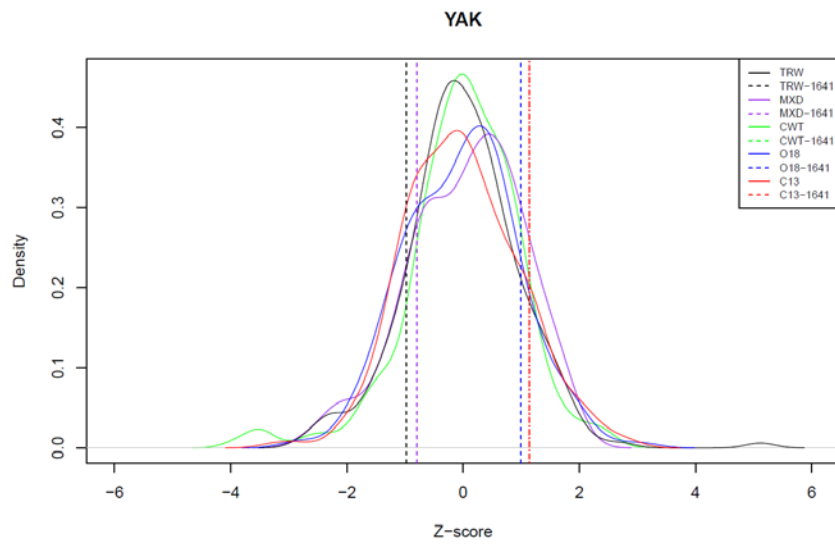

50

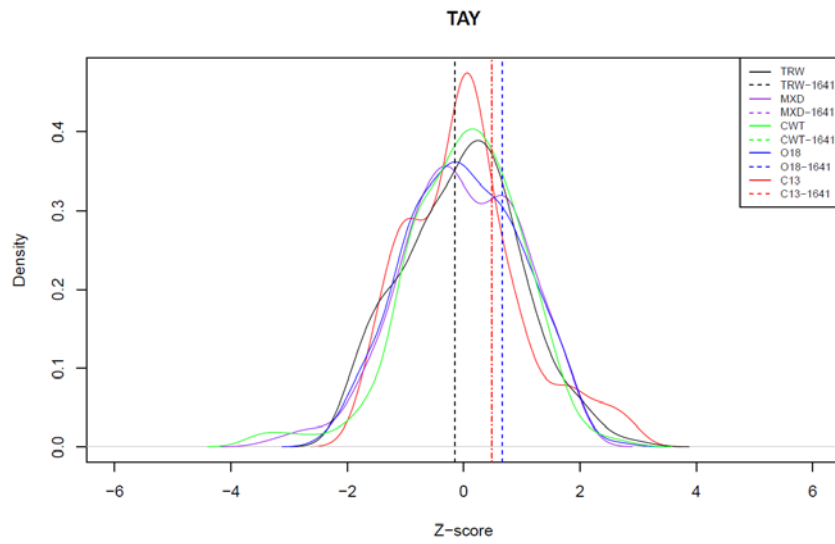

51

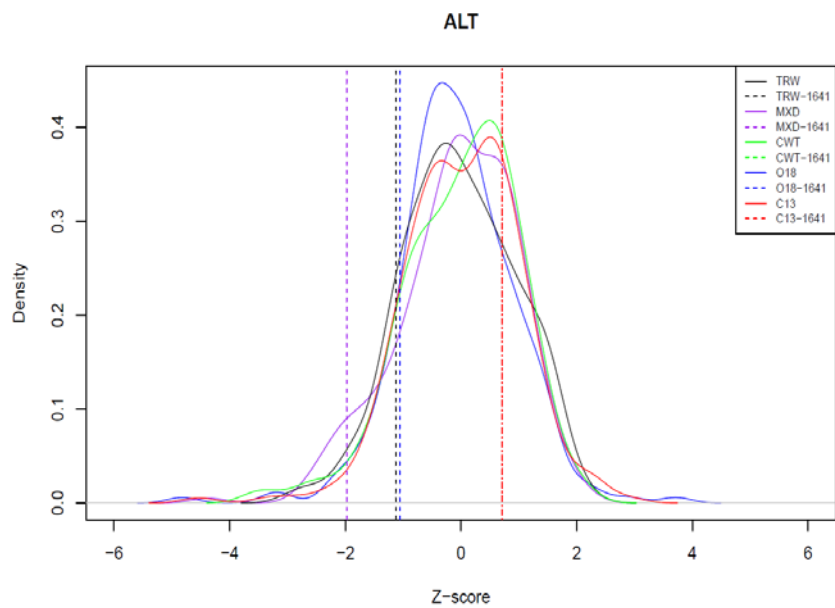

52

53 CE 1642

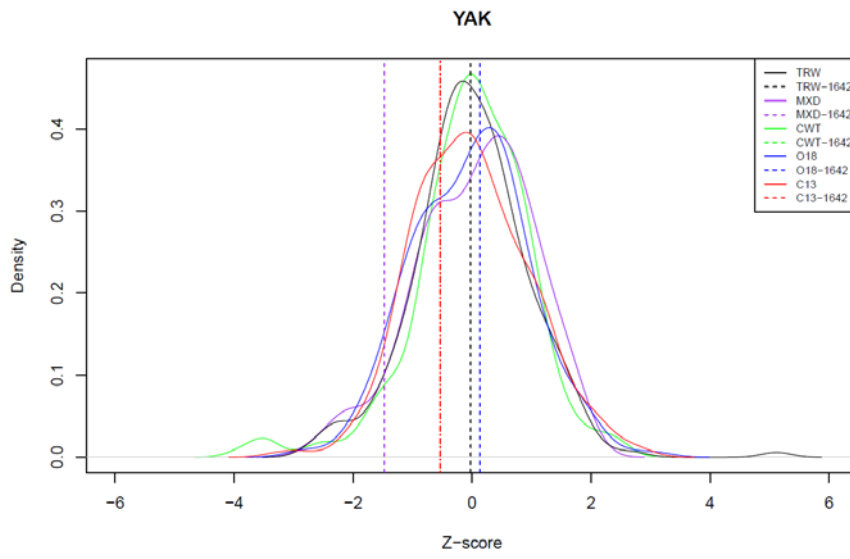

54

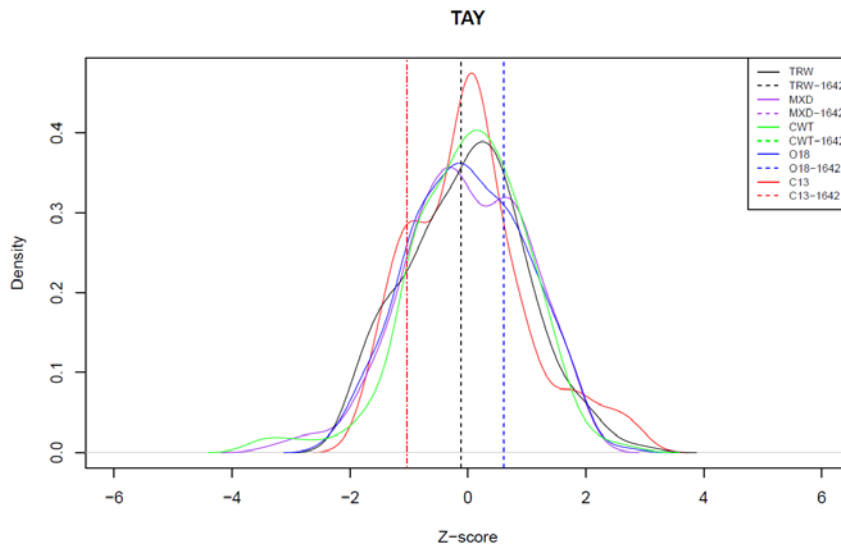

55

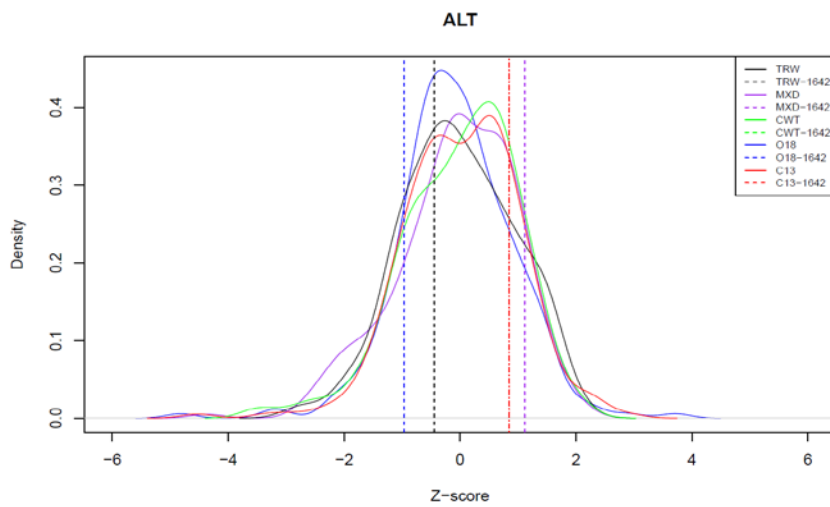

56

57

58

59 CE 1816

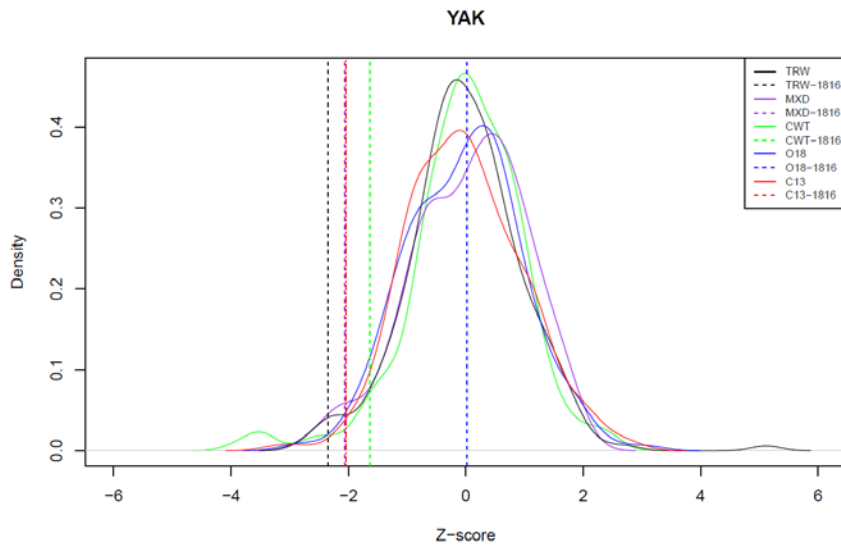

60

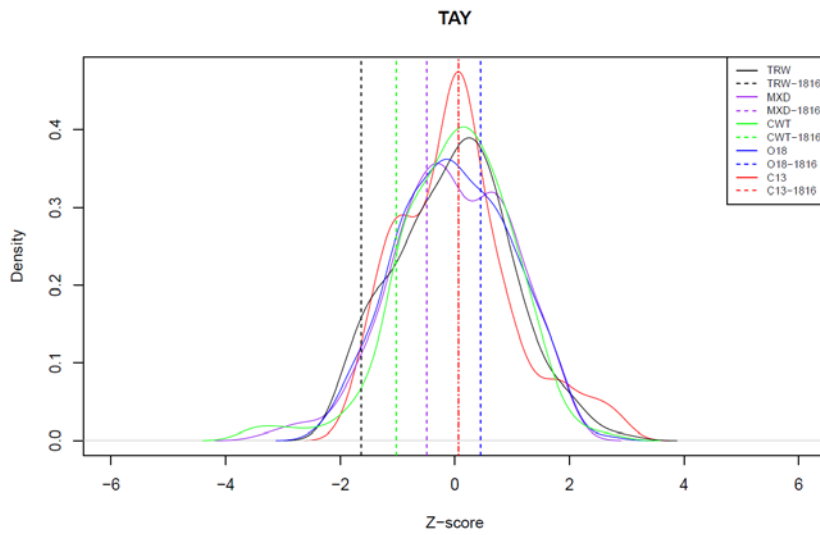

61

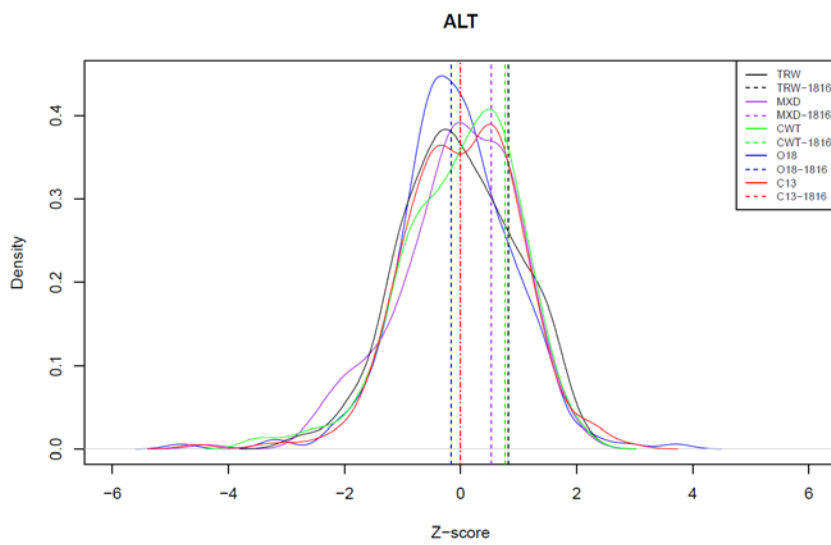

62

63

64

65 CE 1817

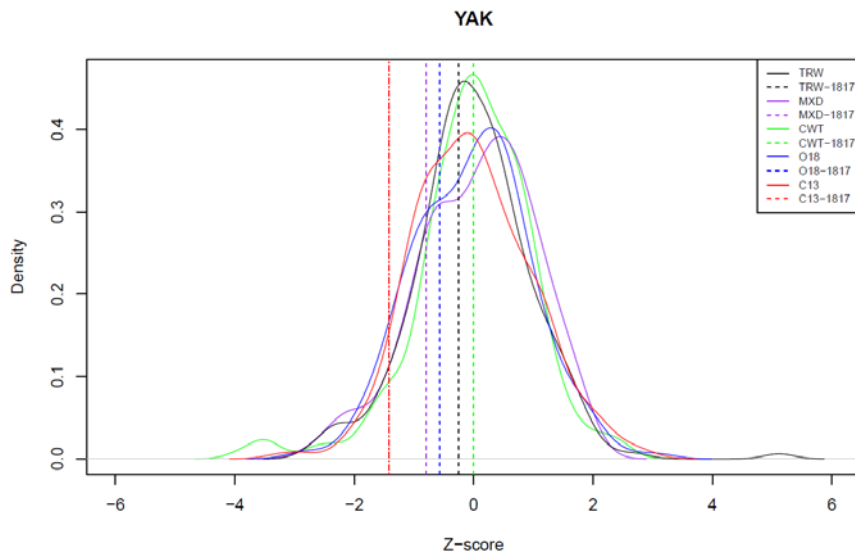

66

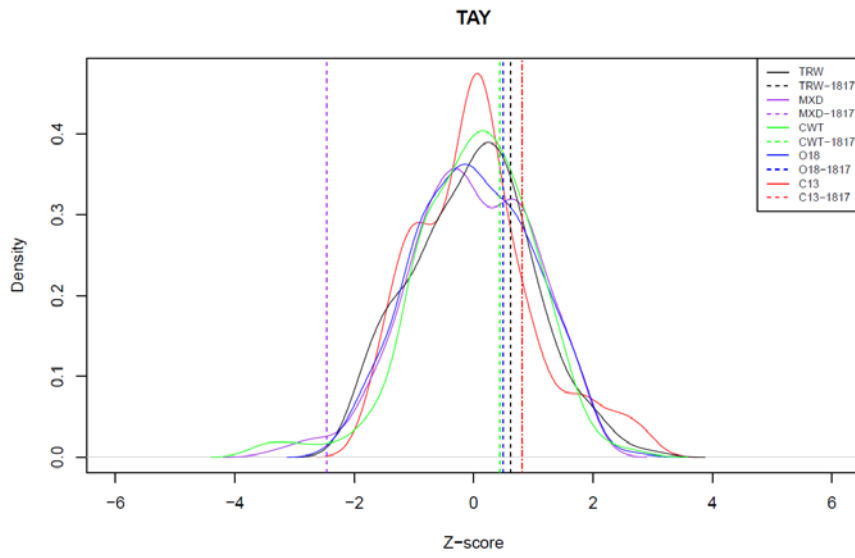

67

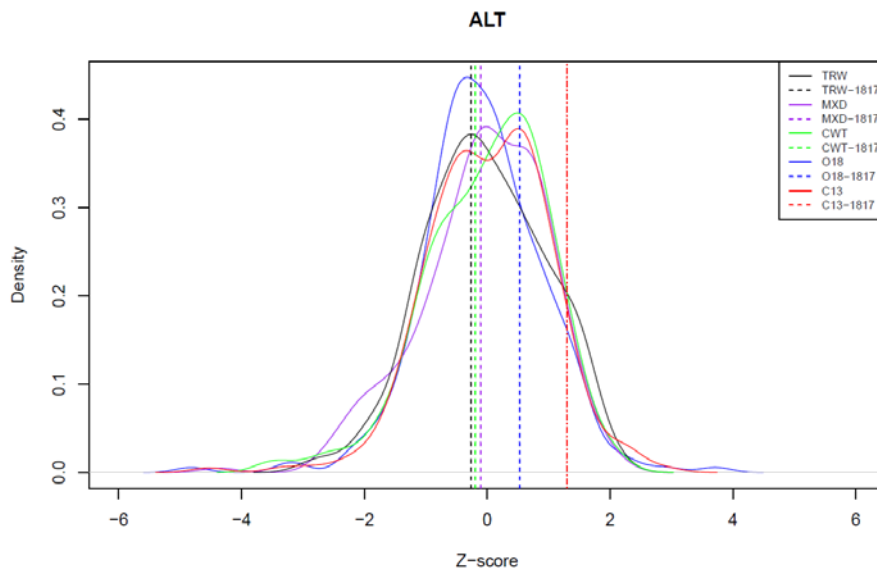

68

69 CE 1992

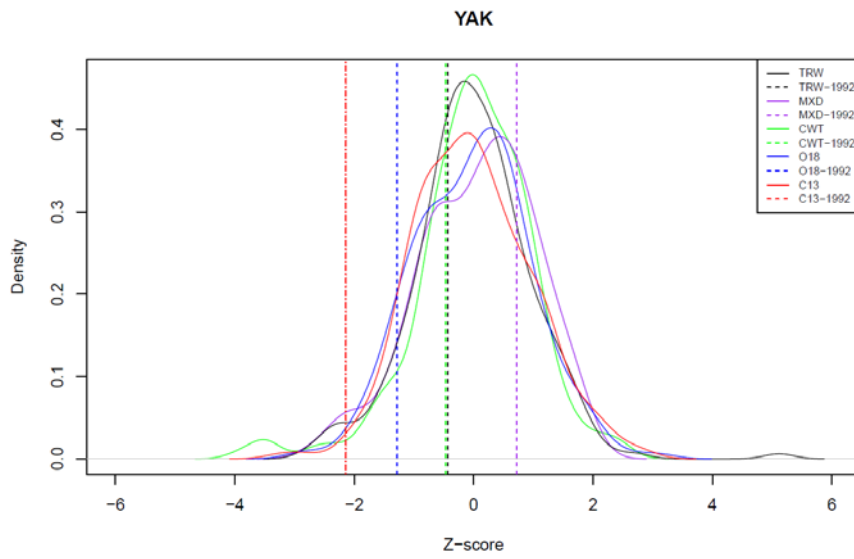

70

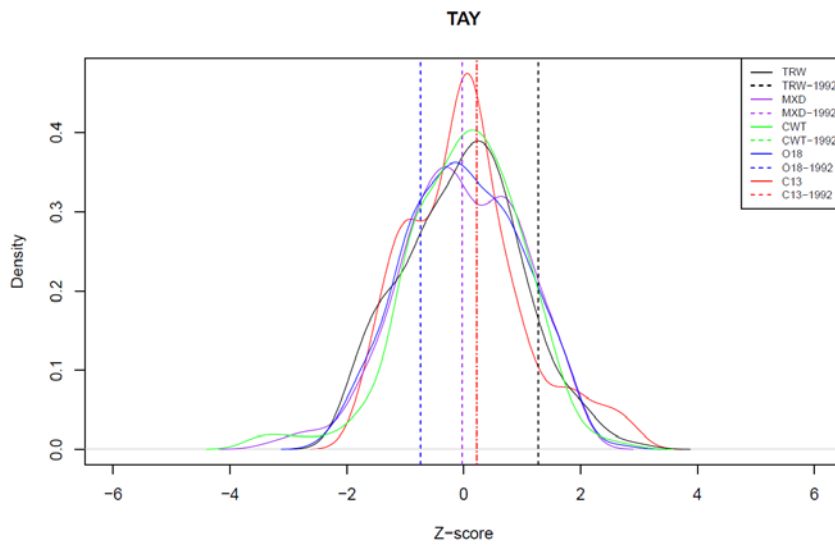

71

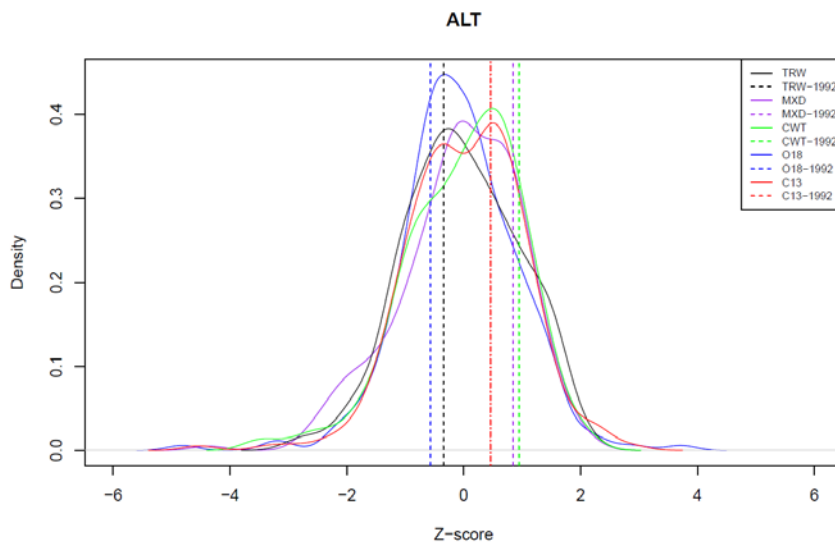

72

73



74 1993

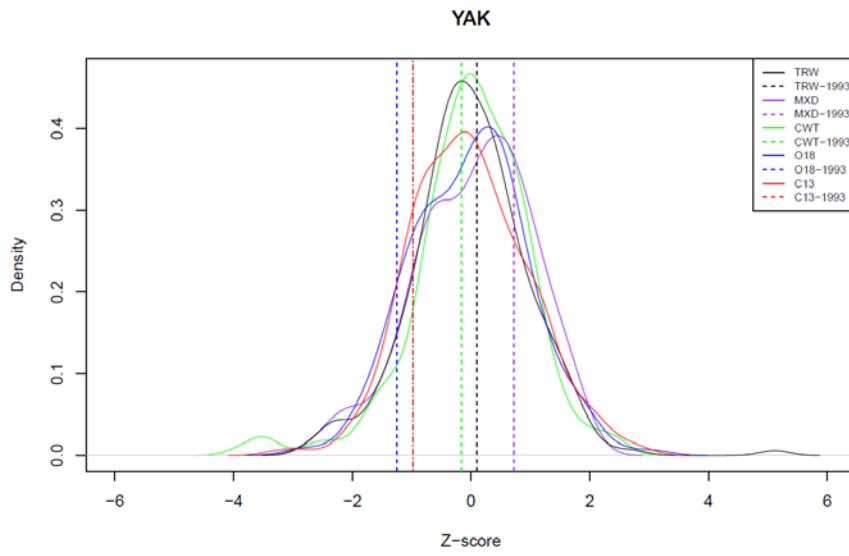

75

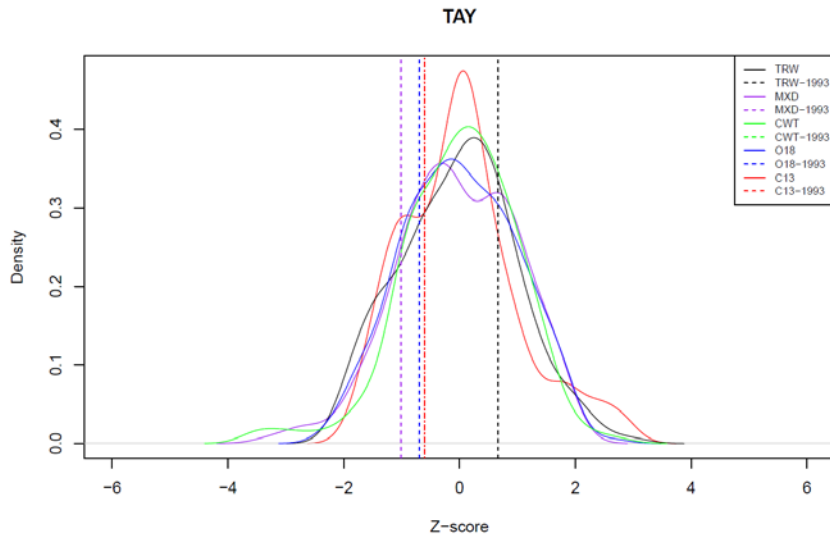

76

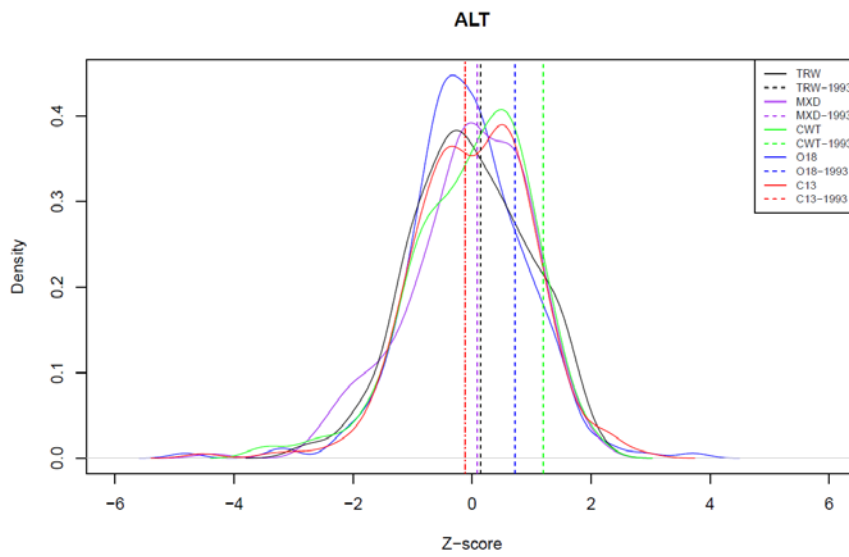

77
